# Supplementary material
Source: Springer Nature journal article supplement (https://www.springermedizin.de/resource/supplementary/12874_2011_565_MOESM3_ESM.pdf/9432476)

J F M A M J J A S O N D J F M A M J J A S O N D J F M A M J J A S O N D

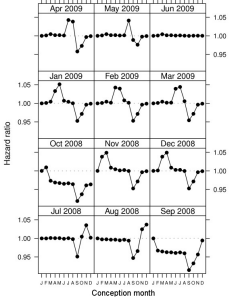

Supplement: MOESM3 [file 9432476]
